# Supplementary material
Source: Springer Nature journal article supplement (https://www.springermedizin.de/resource/supplementary/13045_2009_64_MOESM1_ESM.pdf/9660578)

A

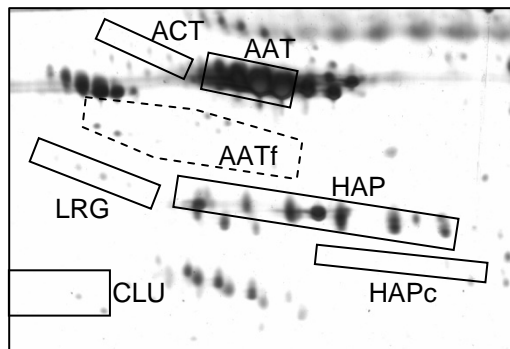

B

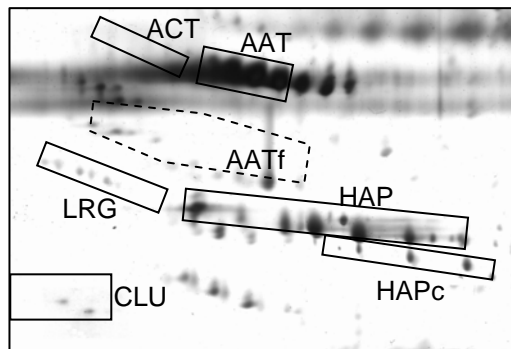

C

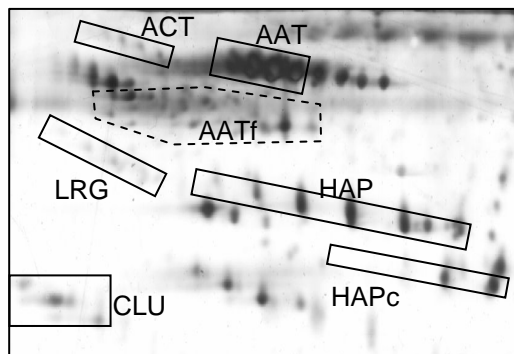

D

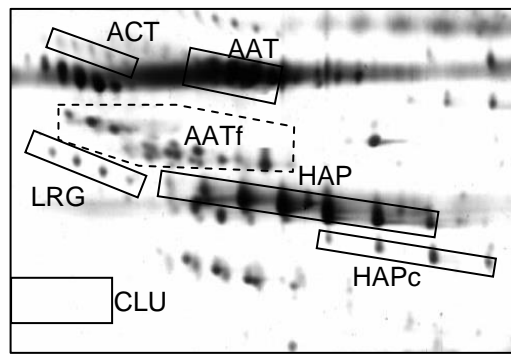

E

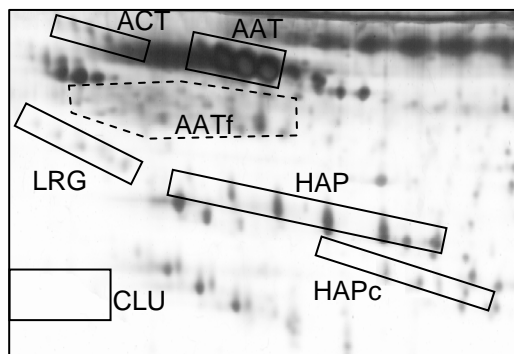

Supplement: MOESM1 [file 9660578]
